# Supplementary material
Source: ML conference proceedings conference paper supplement (https://aclanthology.org/2025.woah-1.36)

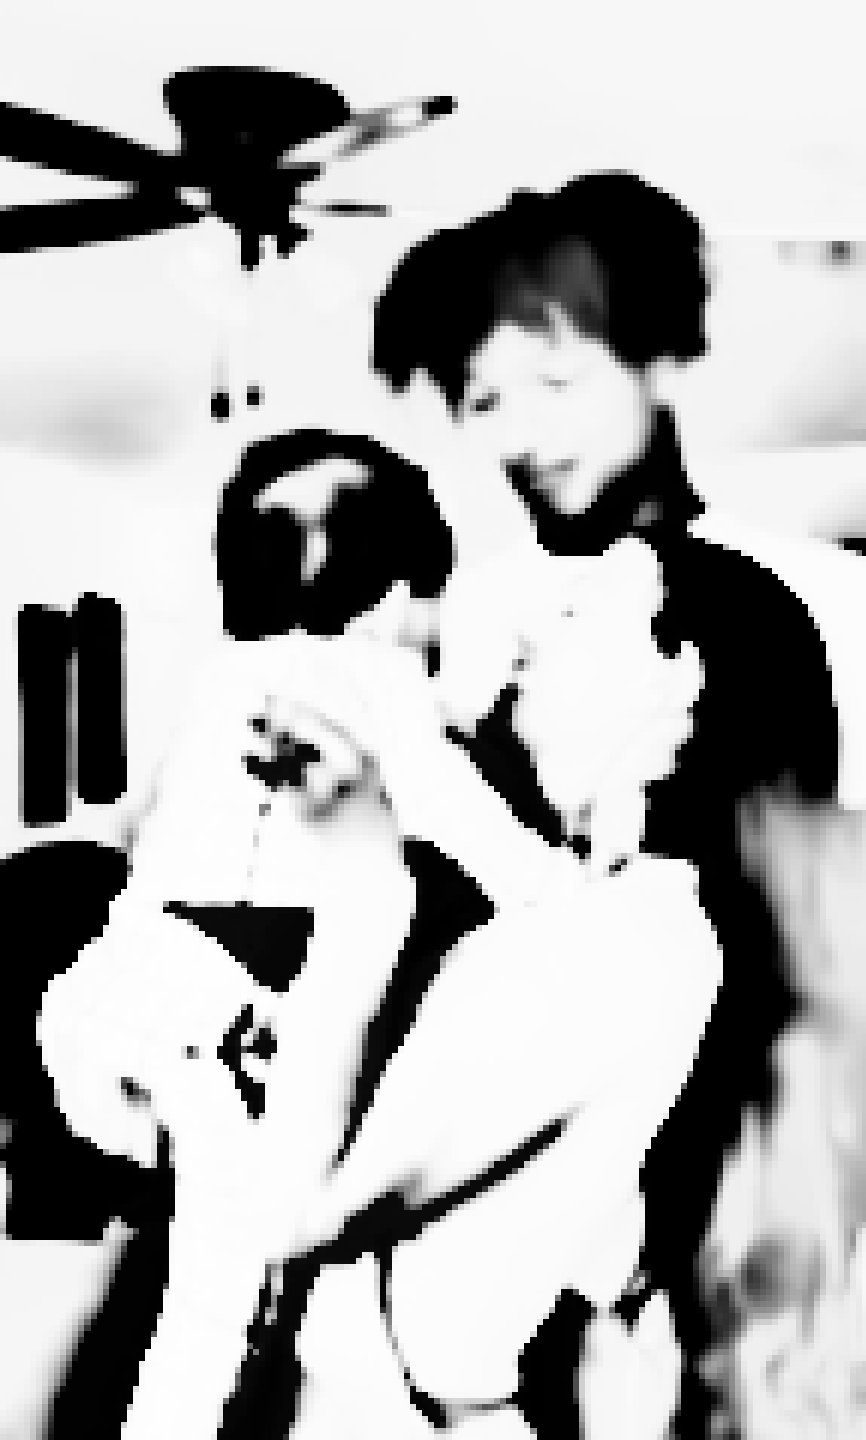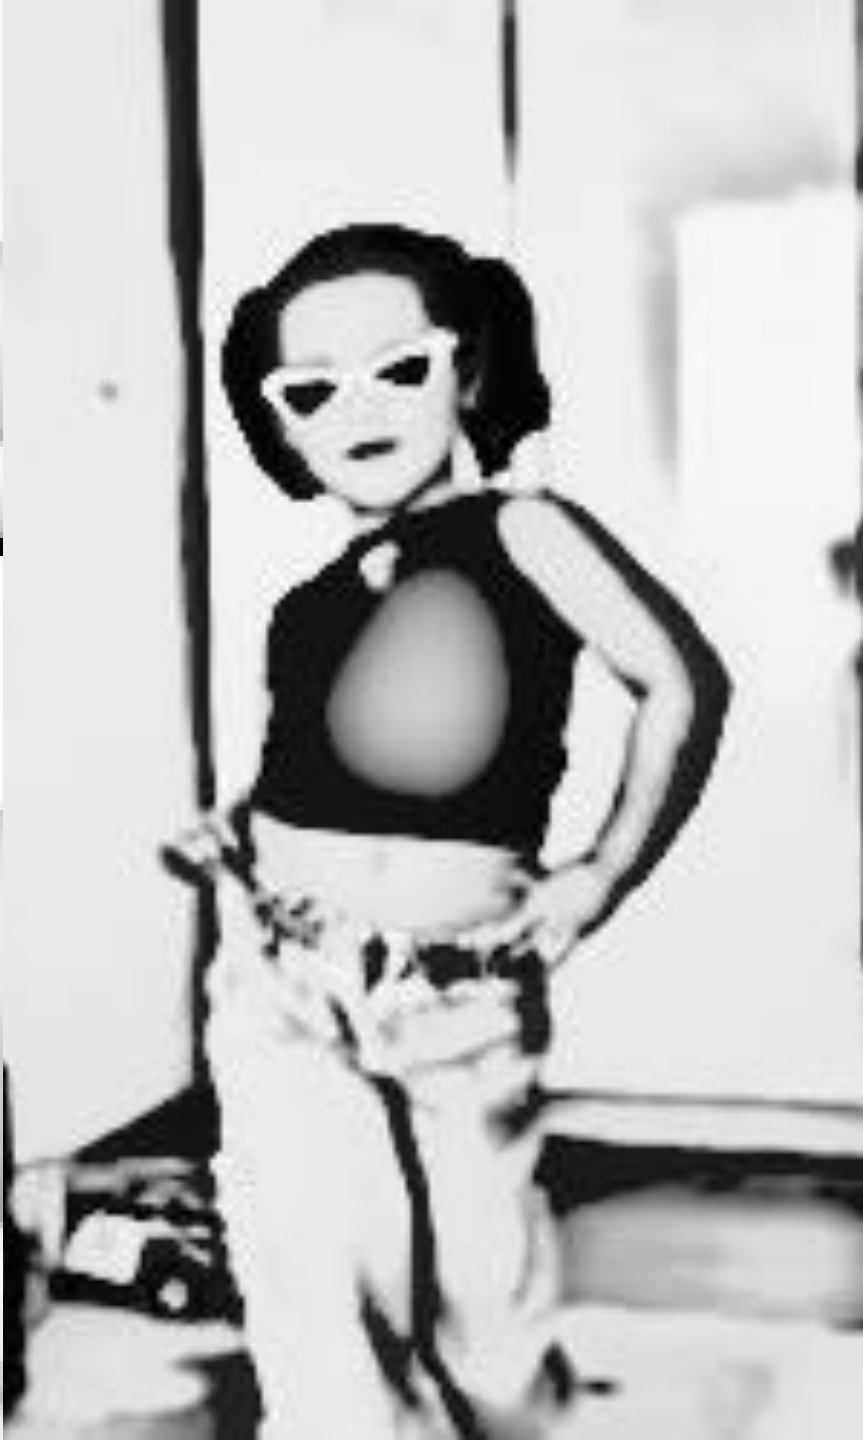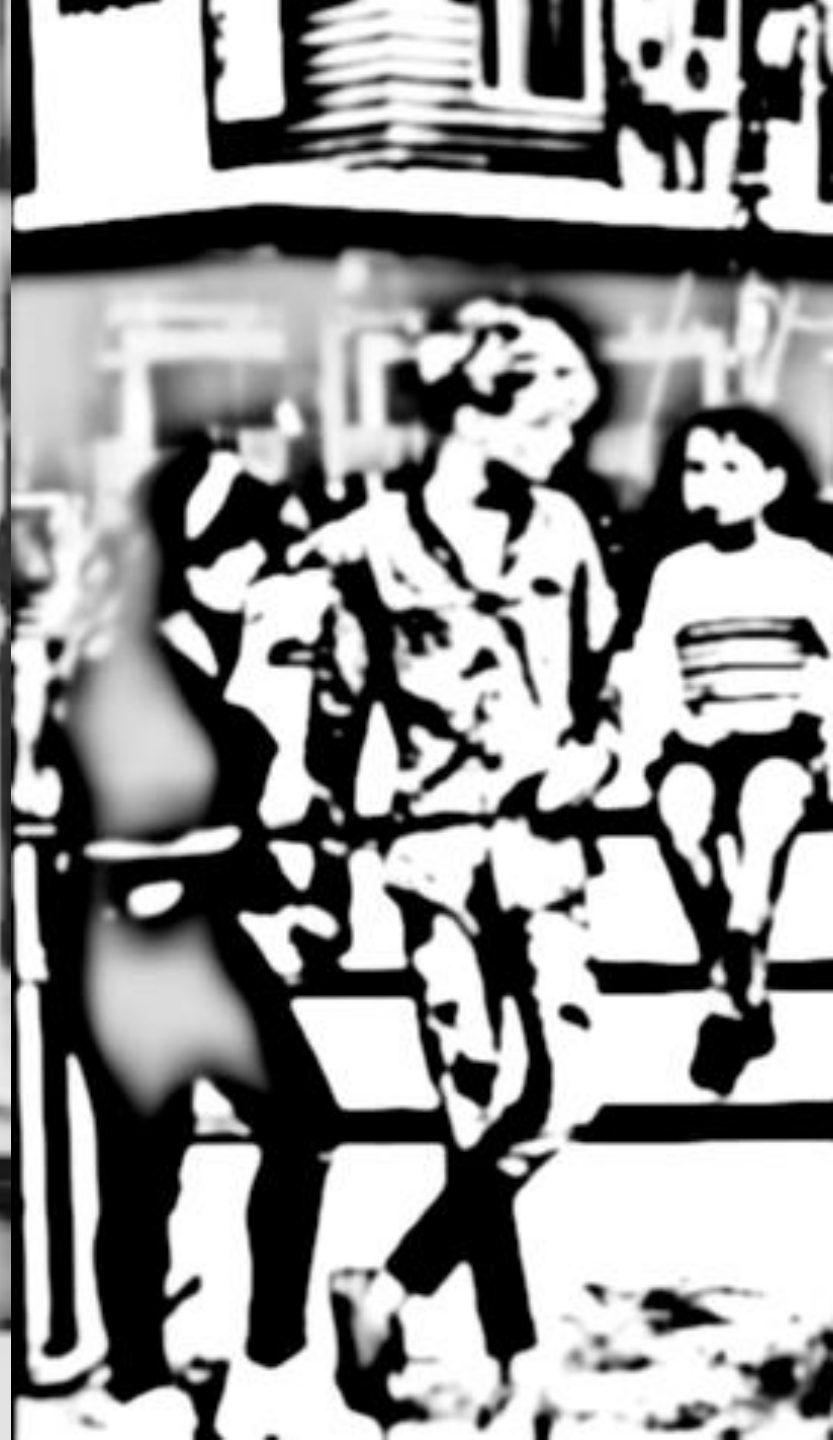

Supplement: SupplementaryMaterial [file Children_Examples.pdf › Child_Objectification_WOAH-2/Figures/Children_Examples.pdf]

### General Appearance-Related Words

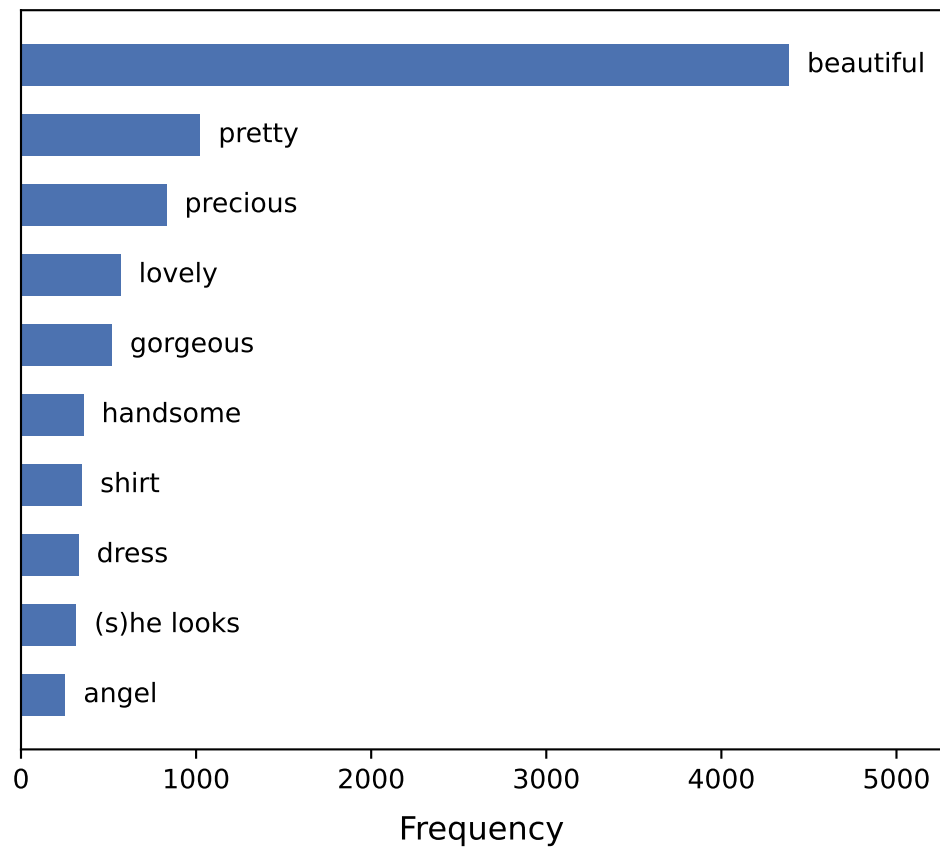

### Objectification-Related Words

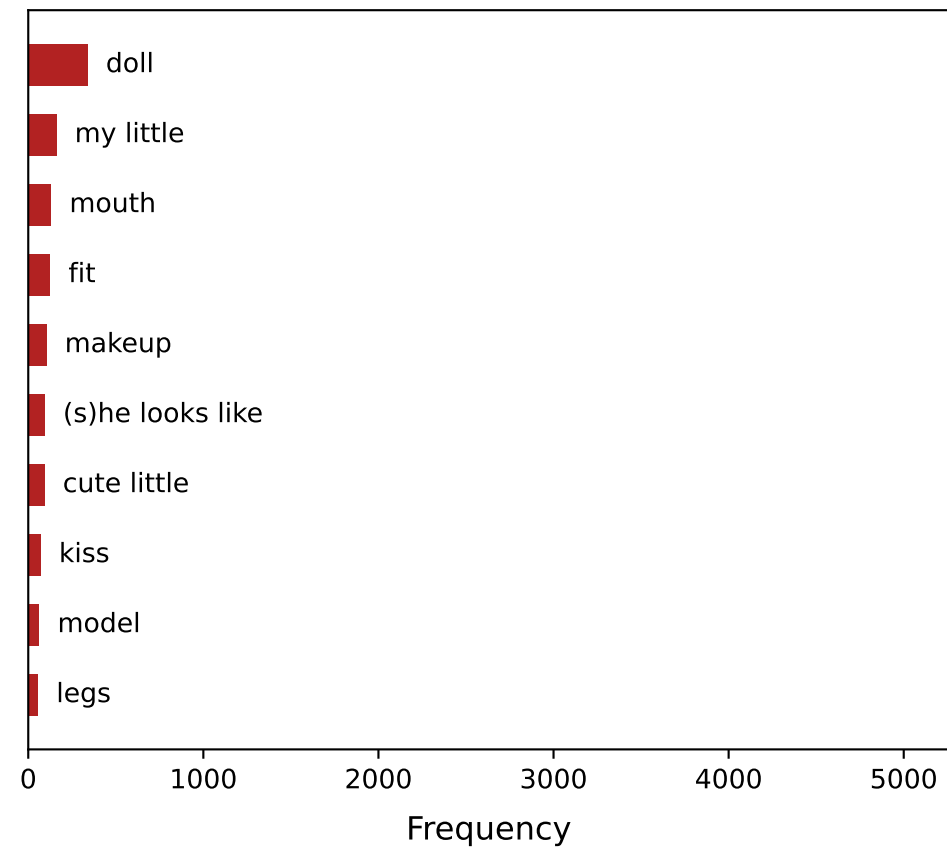

Supplement: SupplementaryMaterial [file frequency_word_plot.pdf › Child_Objectification_WOAH-2/Figures/frequency_word_plot.pdf]

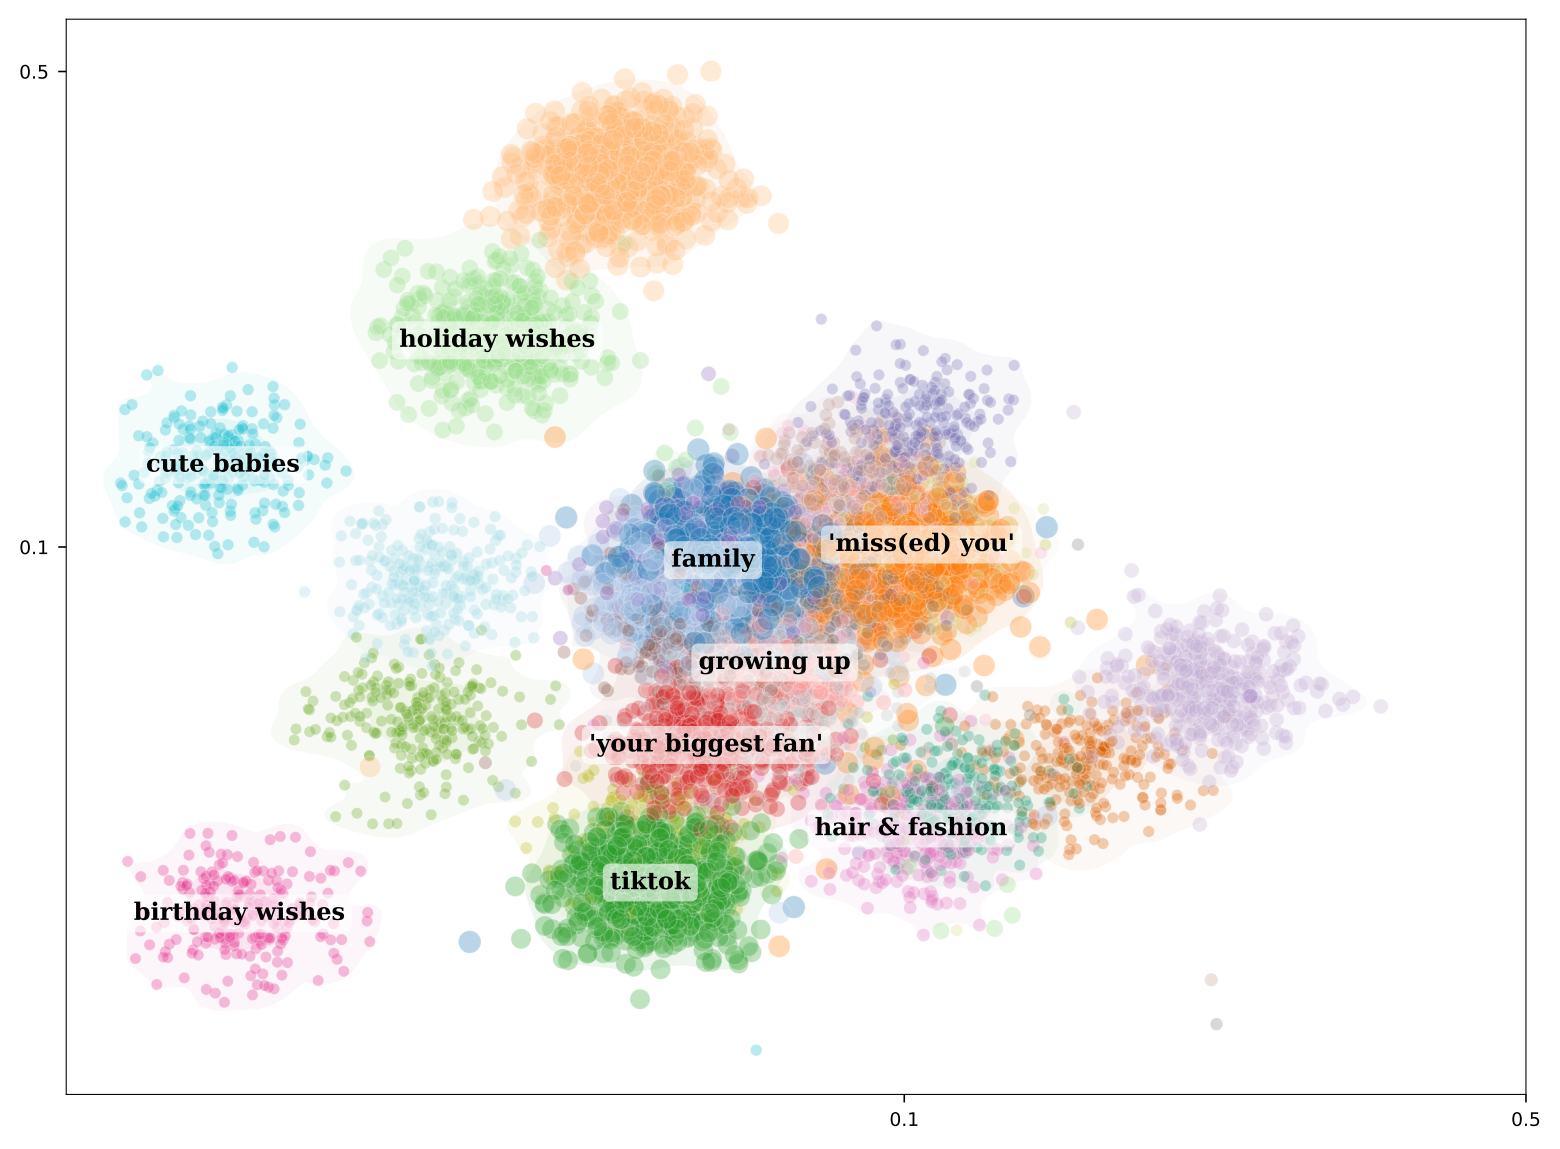

Supplement: SupplementaryMaterial [file prominent_topic_visualization_log.pdf › Child_Objectification_WOAH-2/Figures/prominent_topic_visualization_log.pdf]

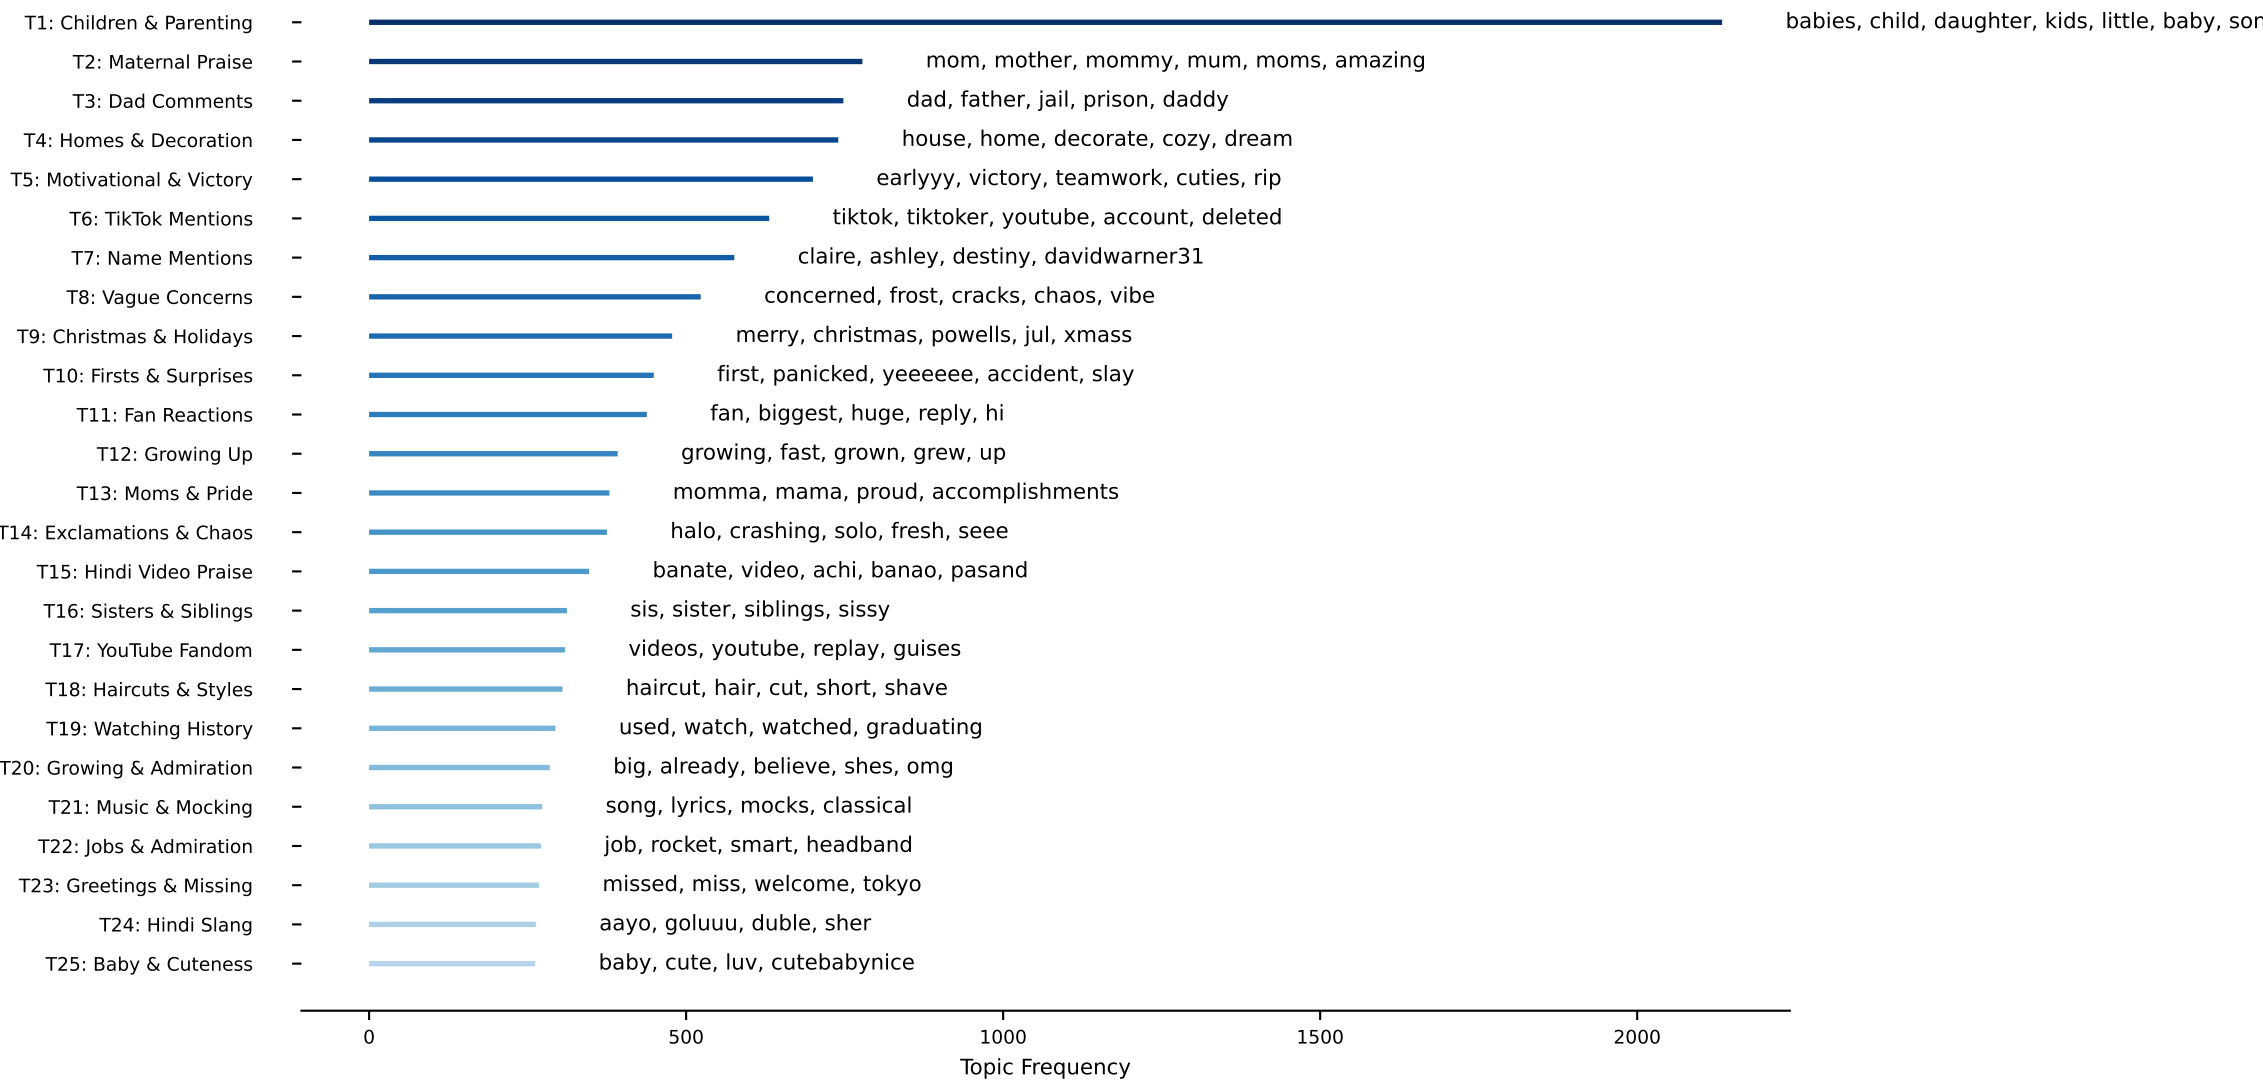

Supplement: SupplementaryMaterial [file topic_overview.pdf › Child_Objectification_WOAH-2/Figures/topic_overview.pdf]

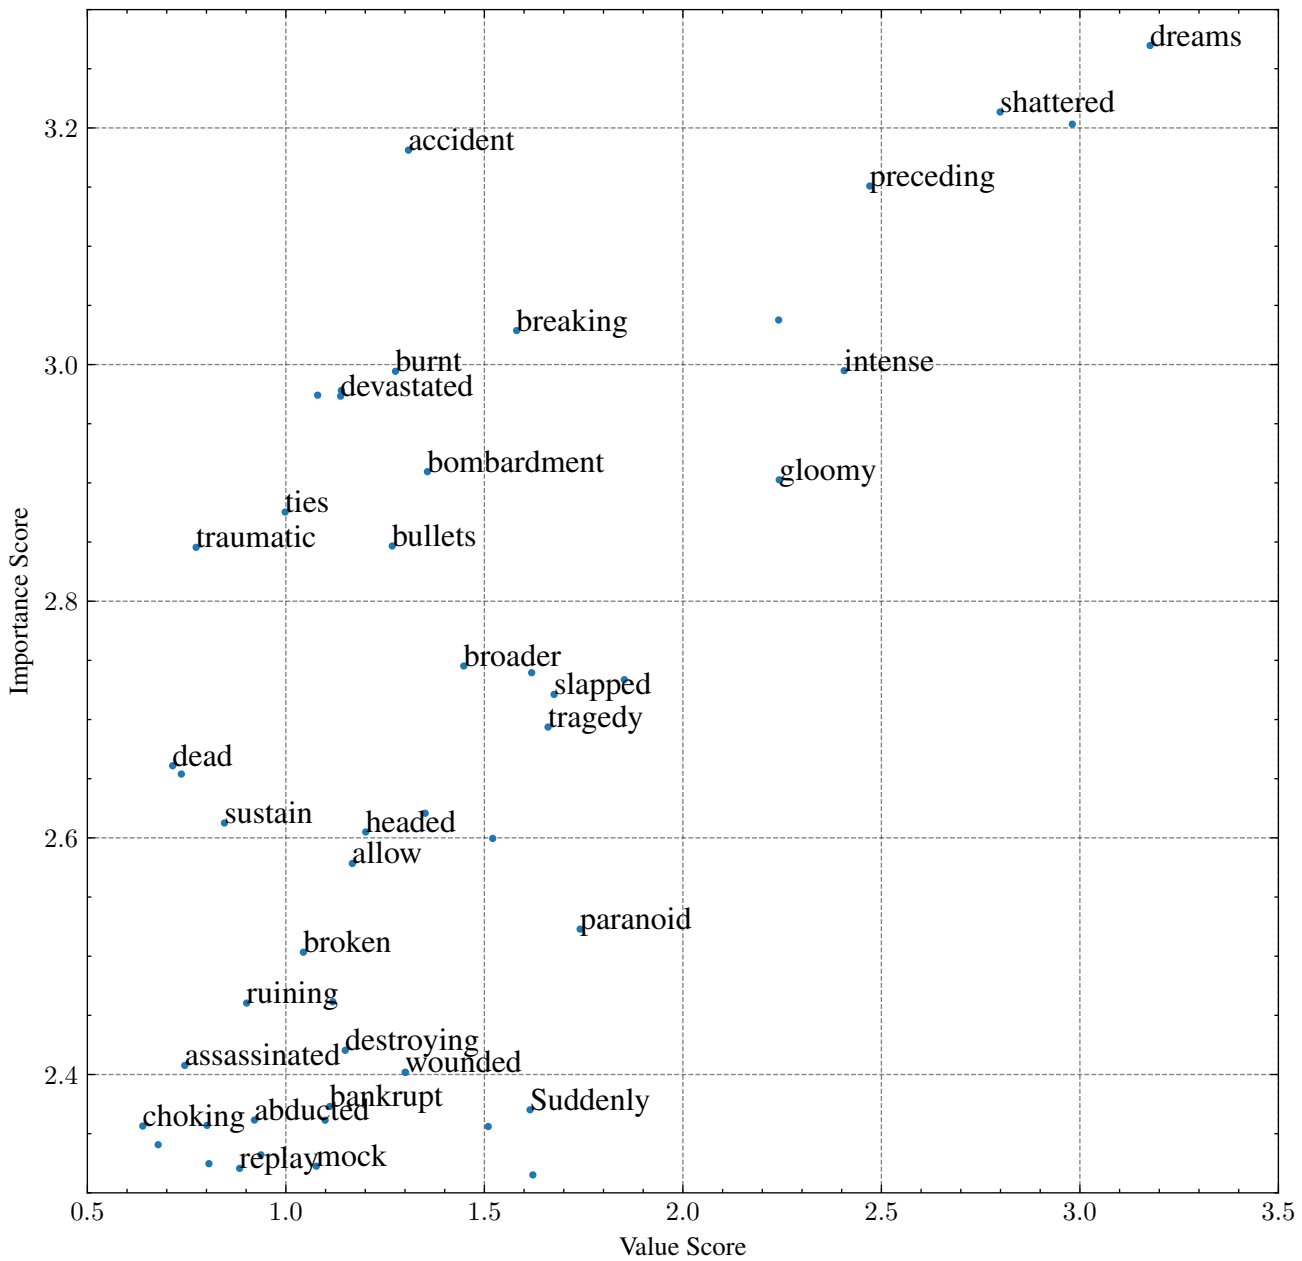

Supplement: SupplementaryMaterial [file SLALOM_ALL.pdf › Child_Objectification_WOAH-2/latex/figures/SLALOM_ALL.pdf]

Train Dataset

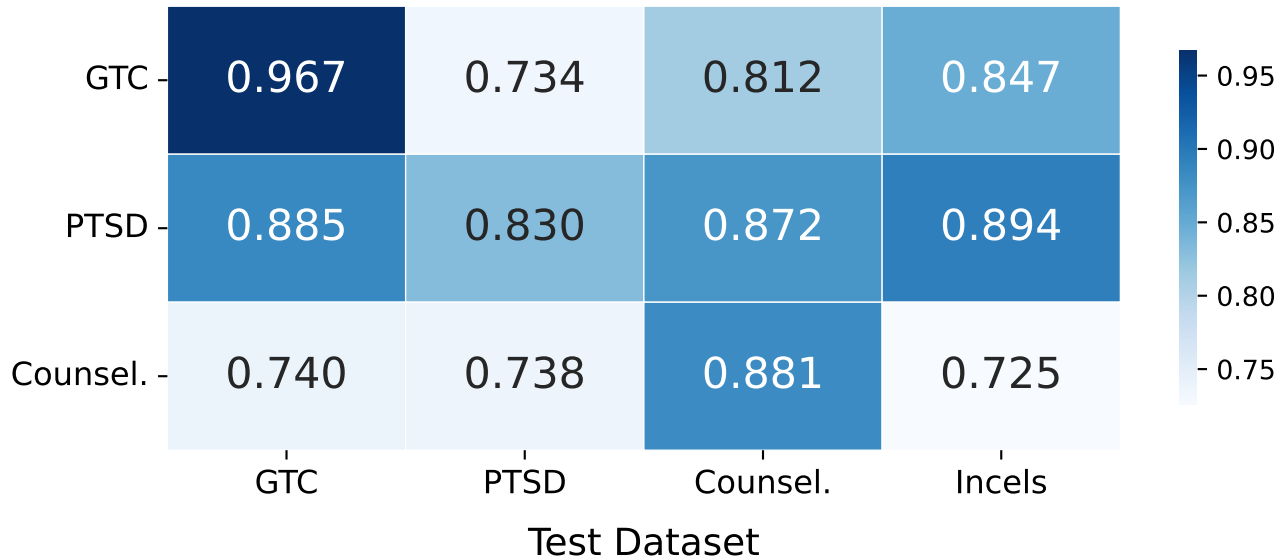

Supplement: SupplementaryMaterial [file heatmap.pdf › Child_Objectification_WOAH-2/latex/figures/heatmap.pdf]

Train Dataset

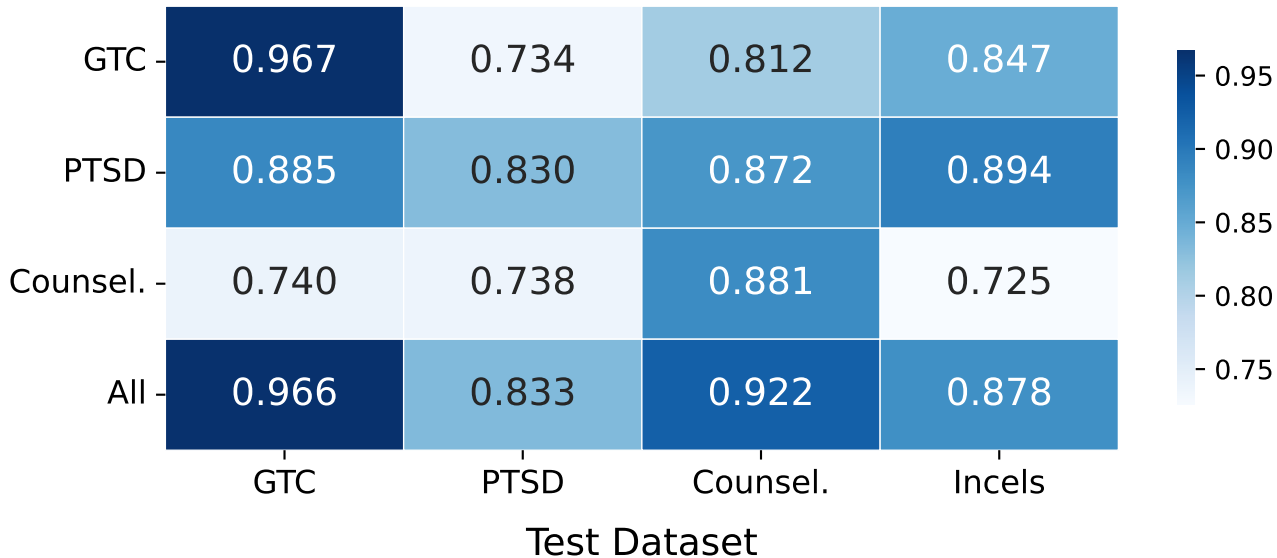

Supplement: SupplementaryMaterial [file heatmap_all.pdf › Child_Objectification_WOAH-2/latex/figures/heatmap_all.pdf]
